# Supplementary material
Source: PubMed Central journal article supplement (PMC6443490)

Supplemental Figure 1. N290 Peak-to-Peak amplitude in the two clusters on the right hemisphere

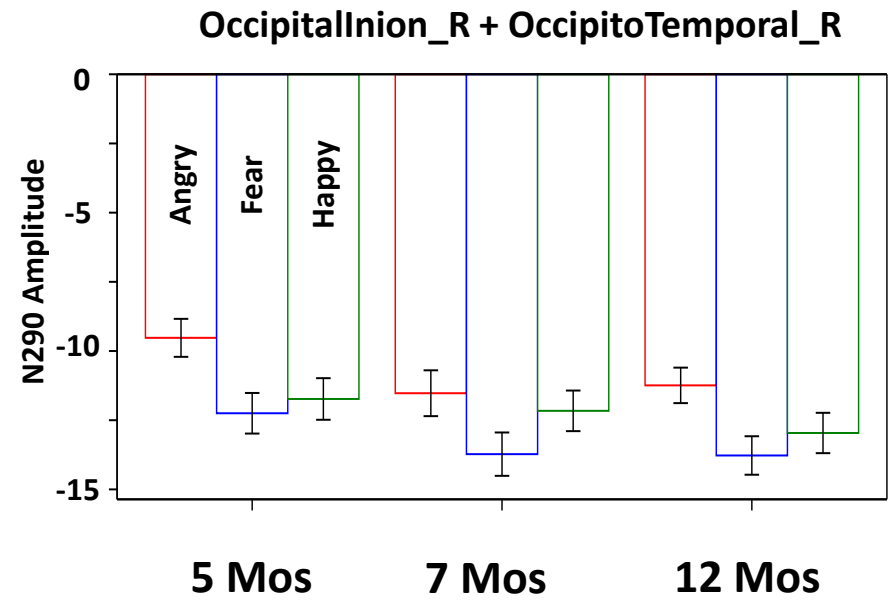

Supplemental Figure 2A. Topographical maps for the N290 activity at 5 months

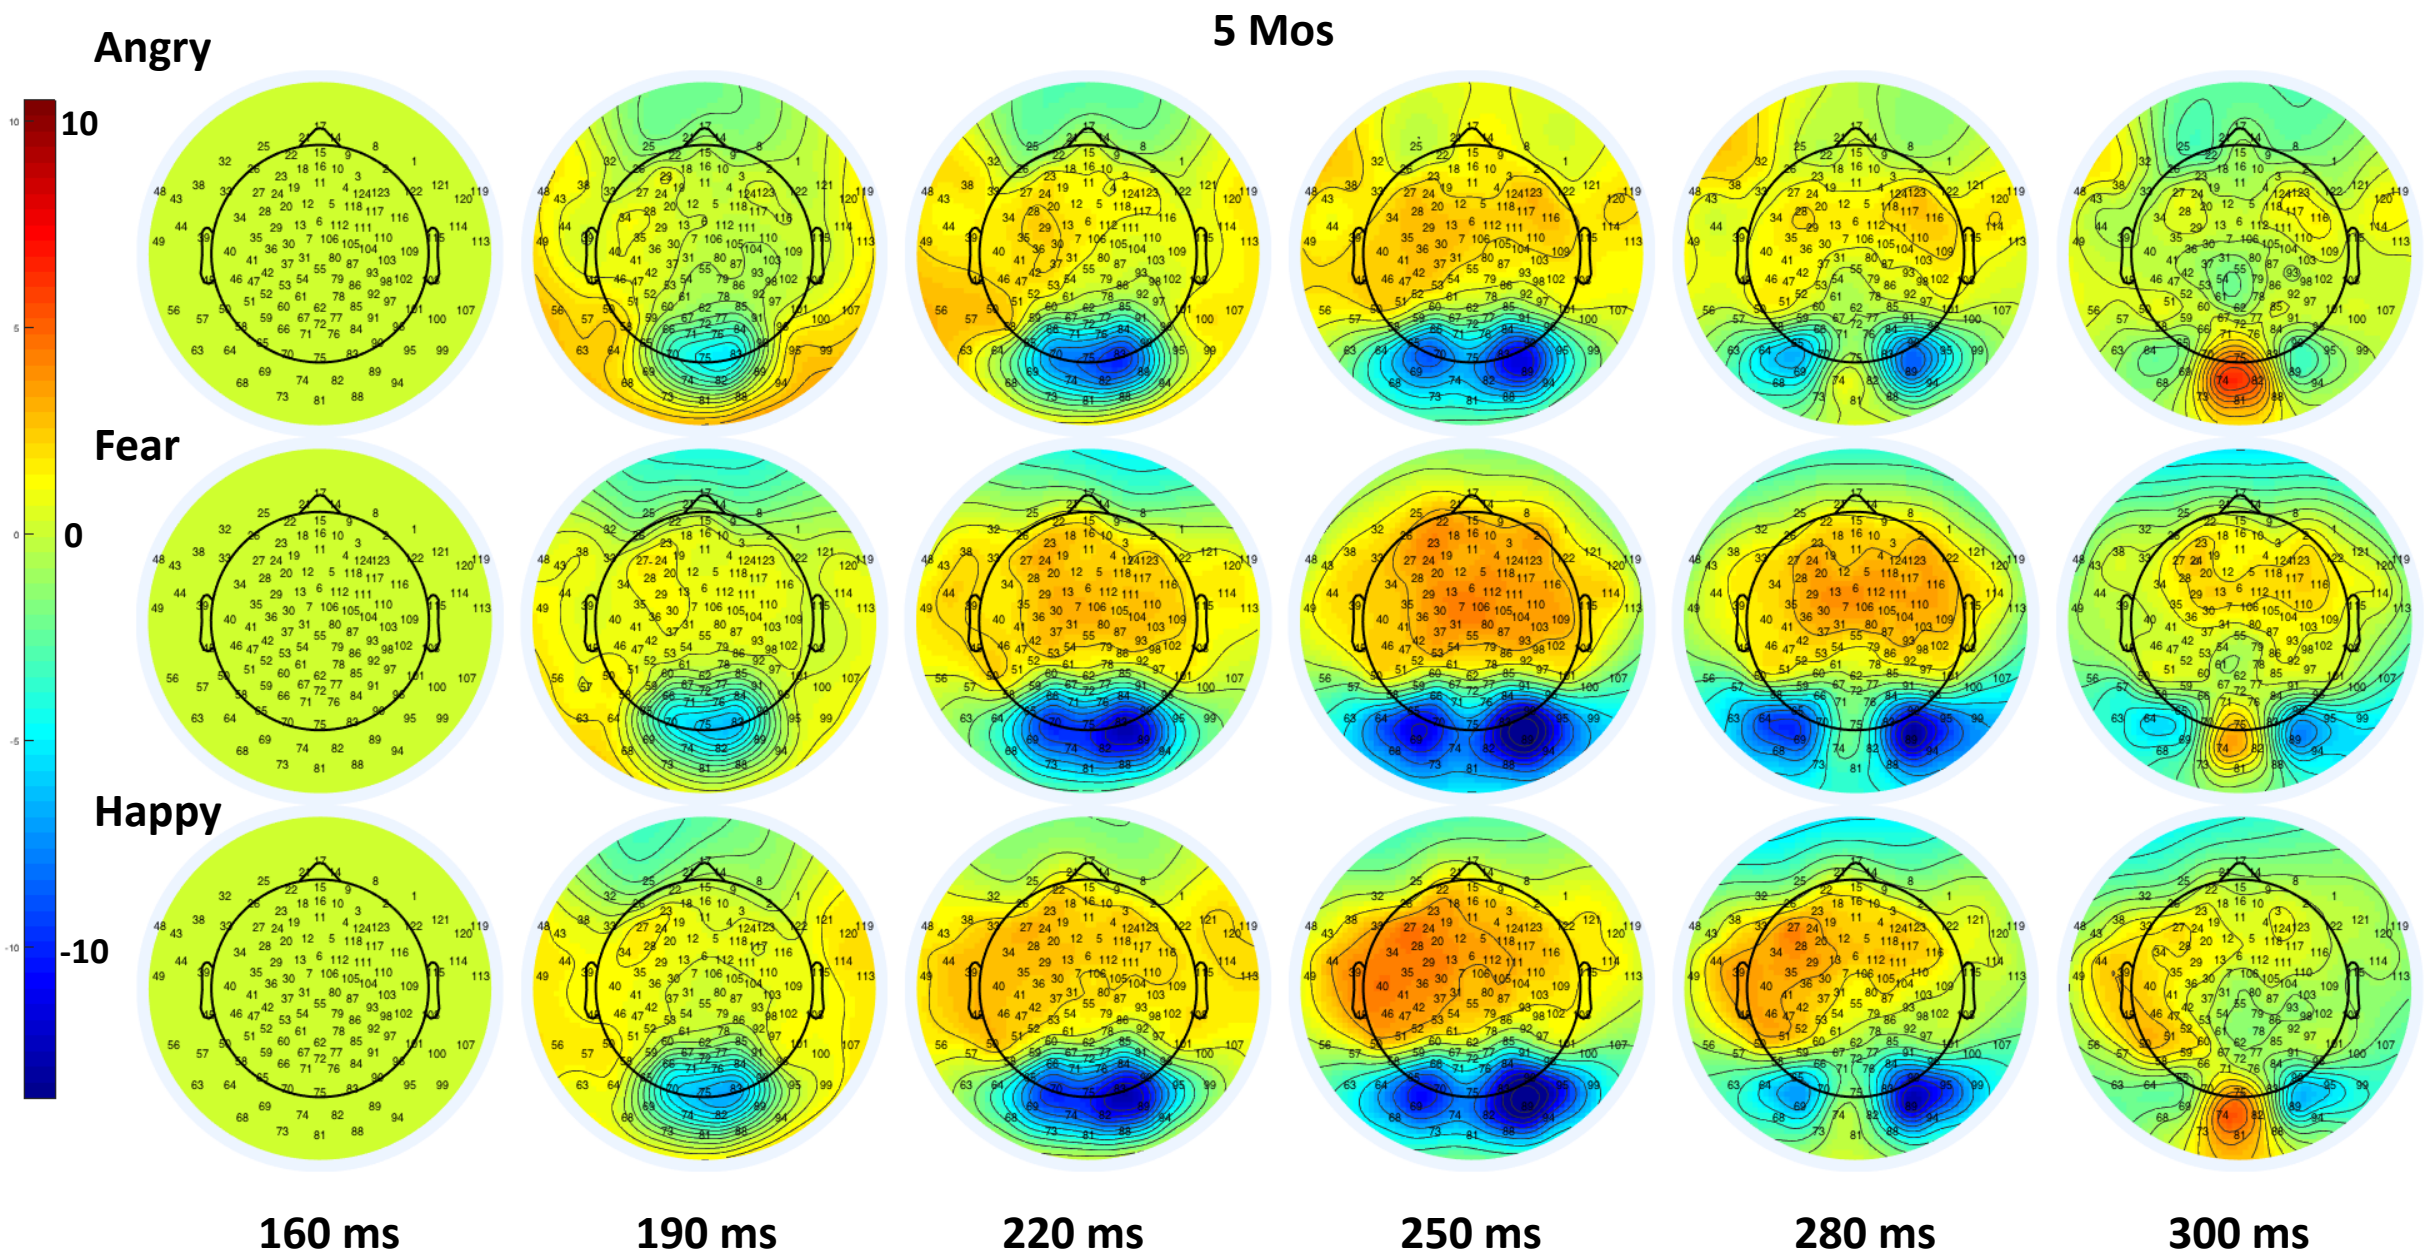



# Supplemental Figure 2B. Topographical maps for the N290 activity at 7 months

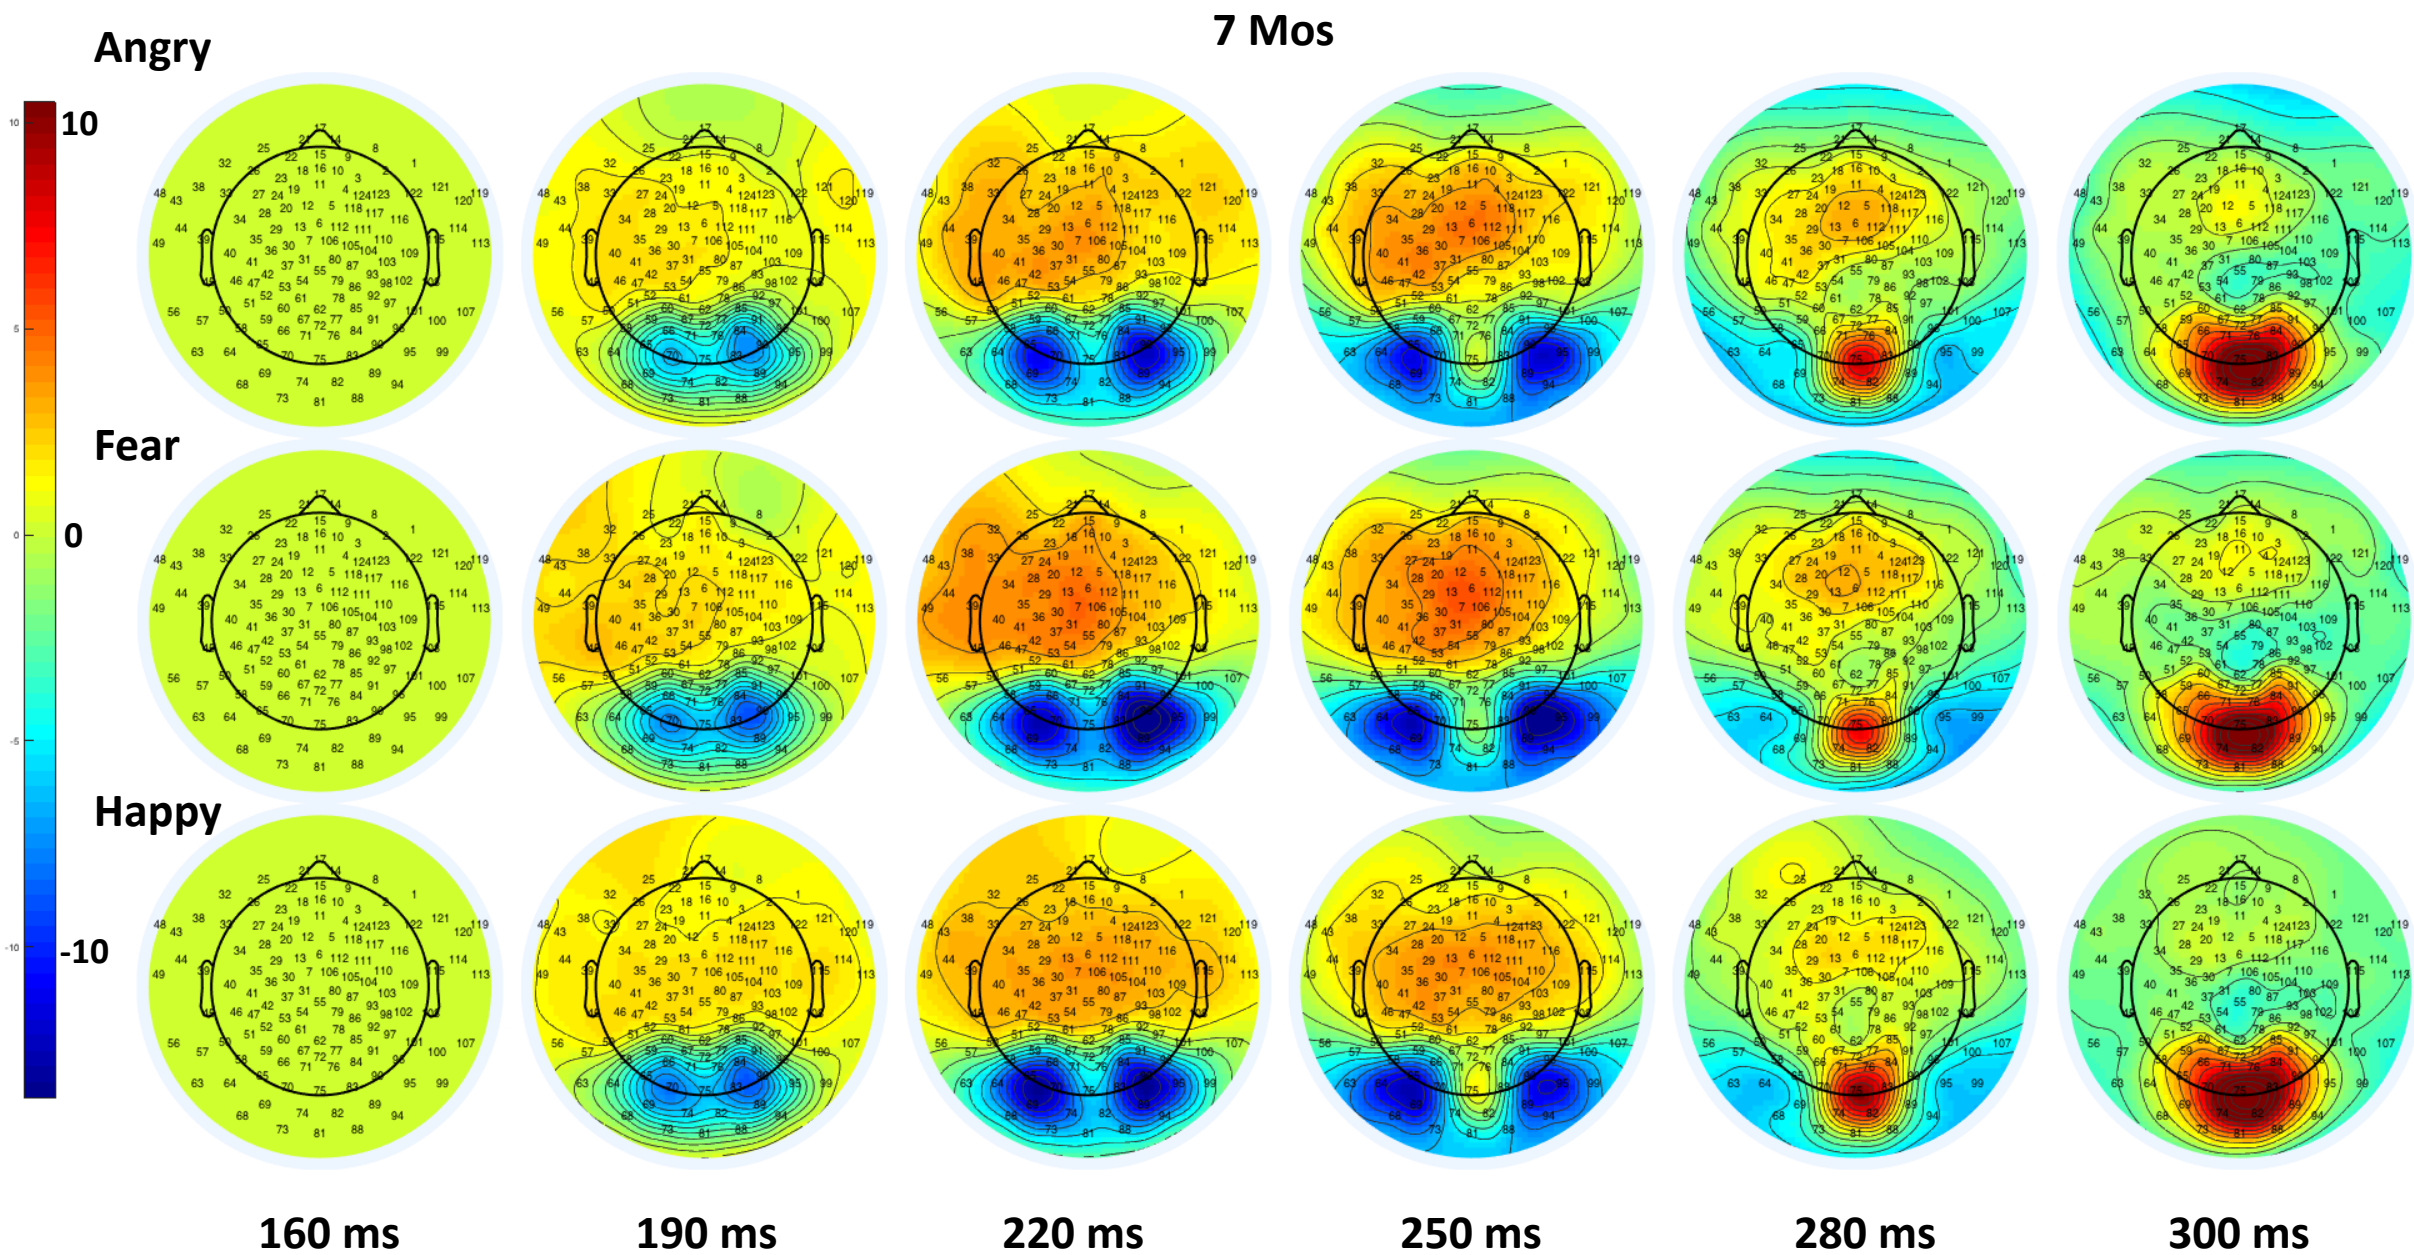



# Supplemental Figure 2C. Topographical maps for the N290 activity at 12 months

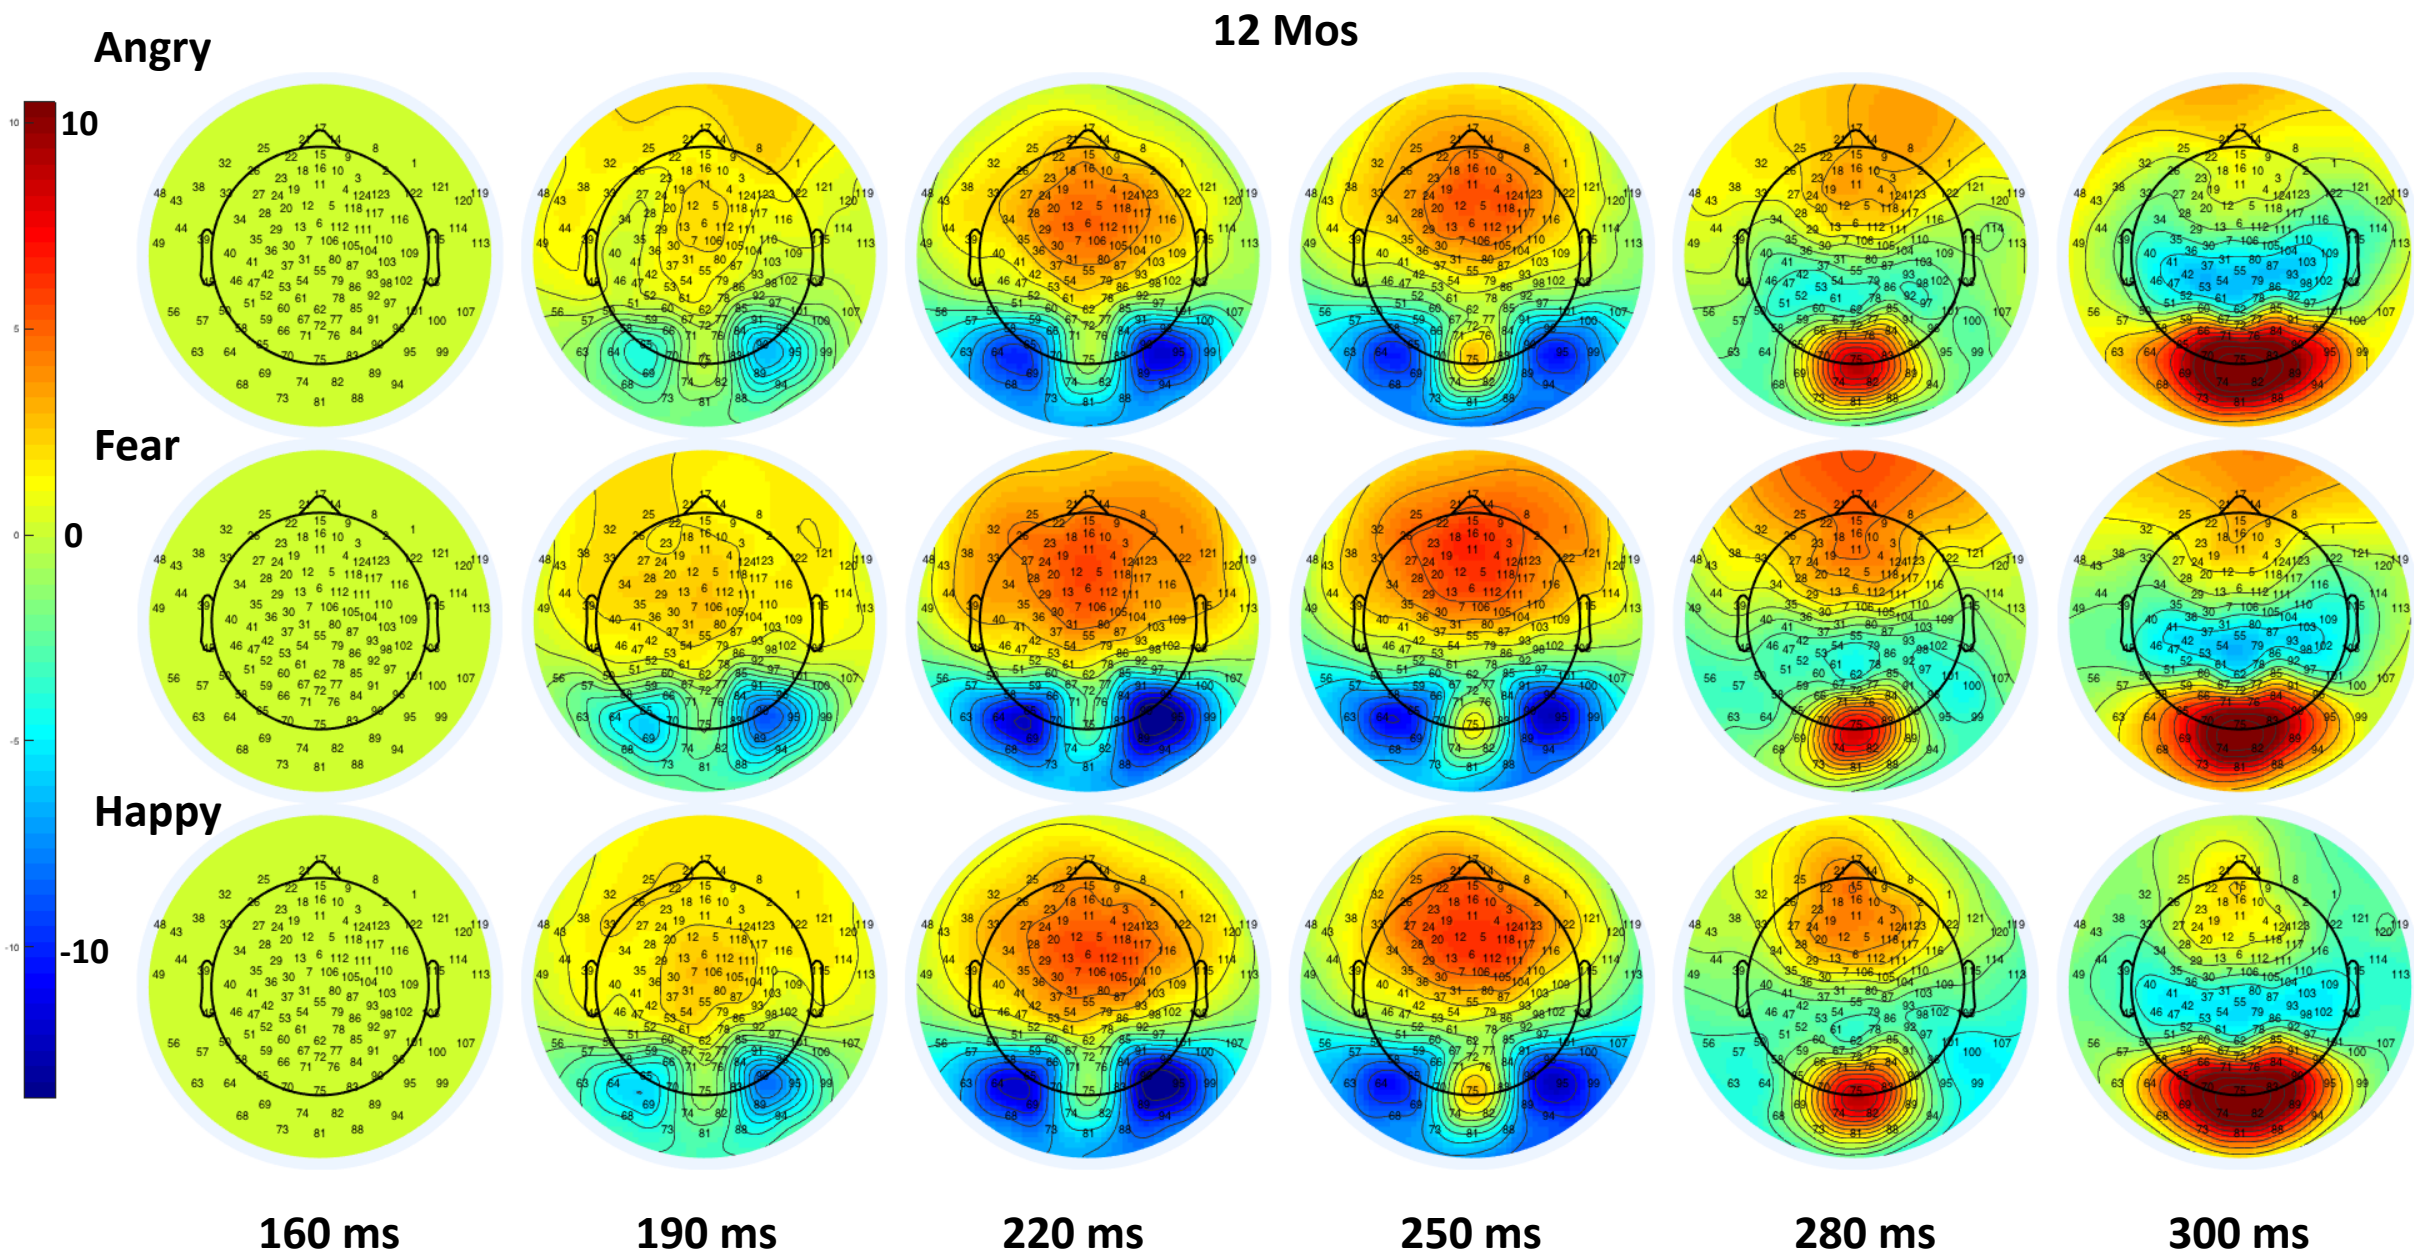



Supplemental Figure 3A. Topographical maps for the P400 and Nc activity at 5 months

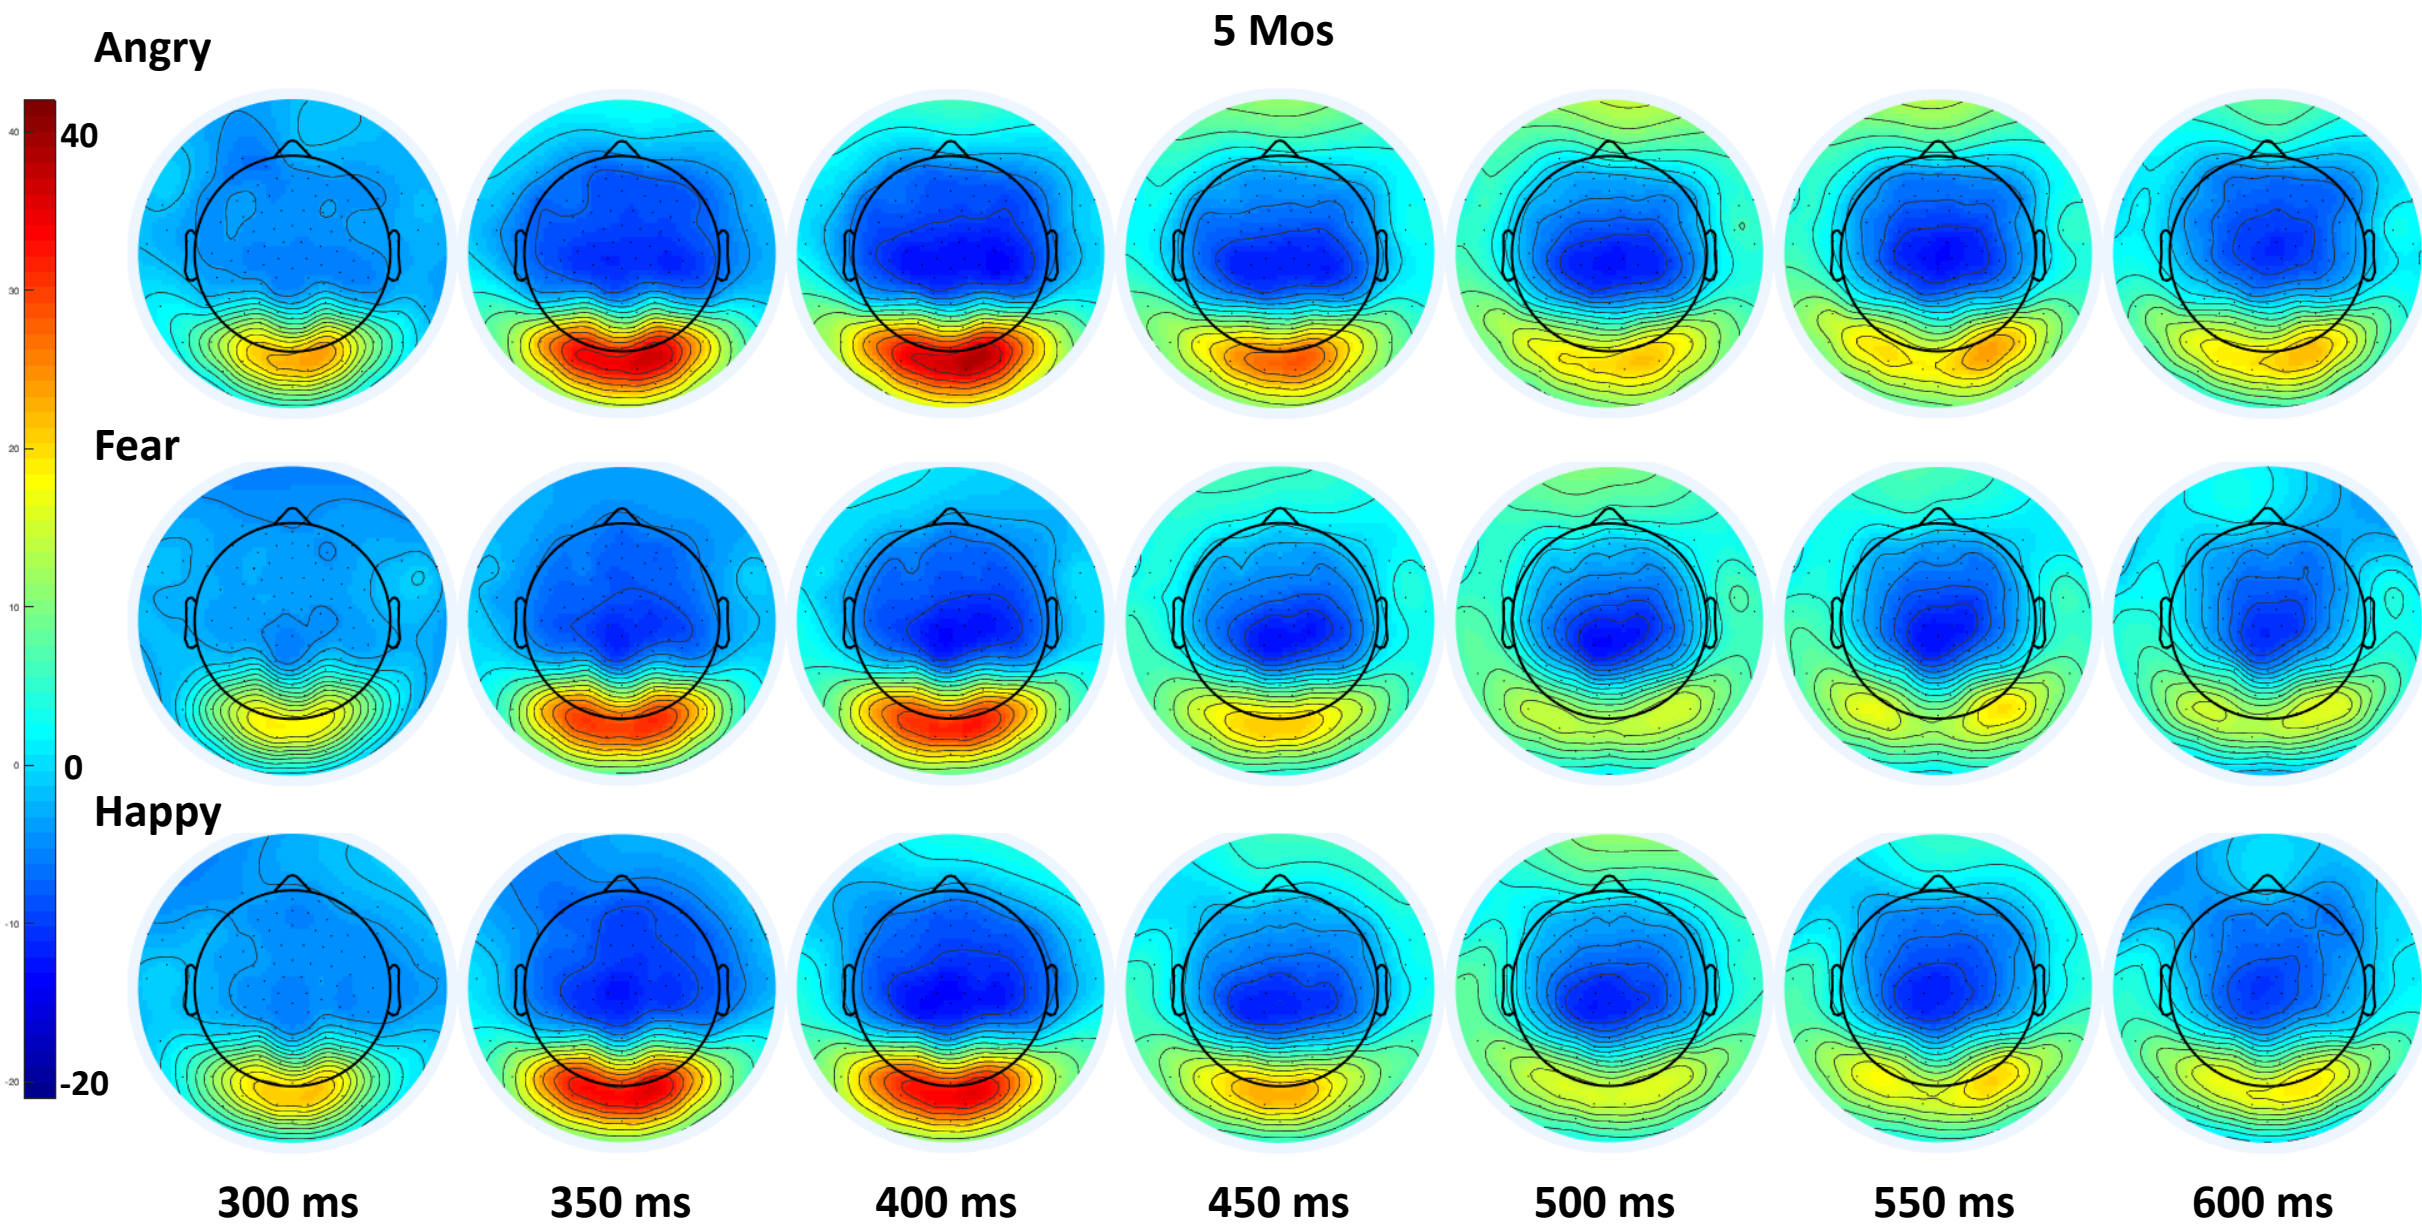

Supplemental Figure 3B. Topographical maps for the P400 and Nc activity at 7 months

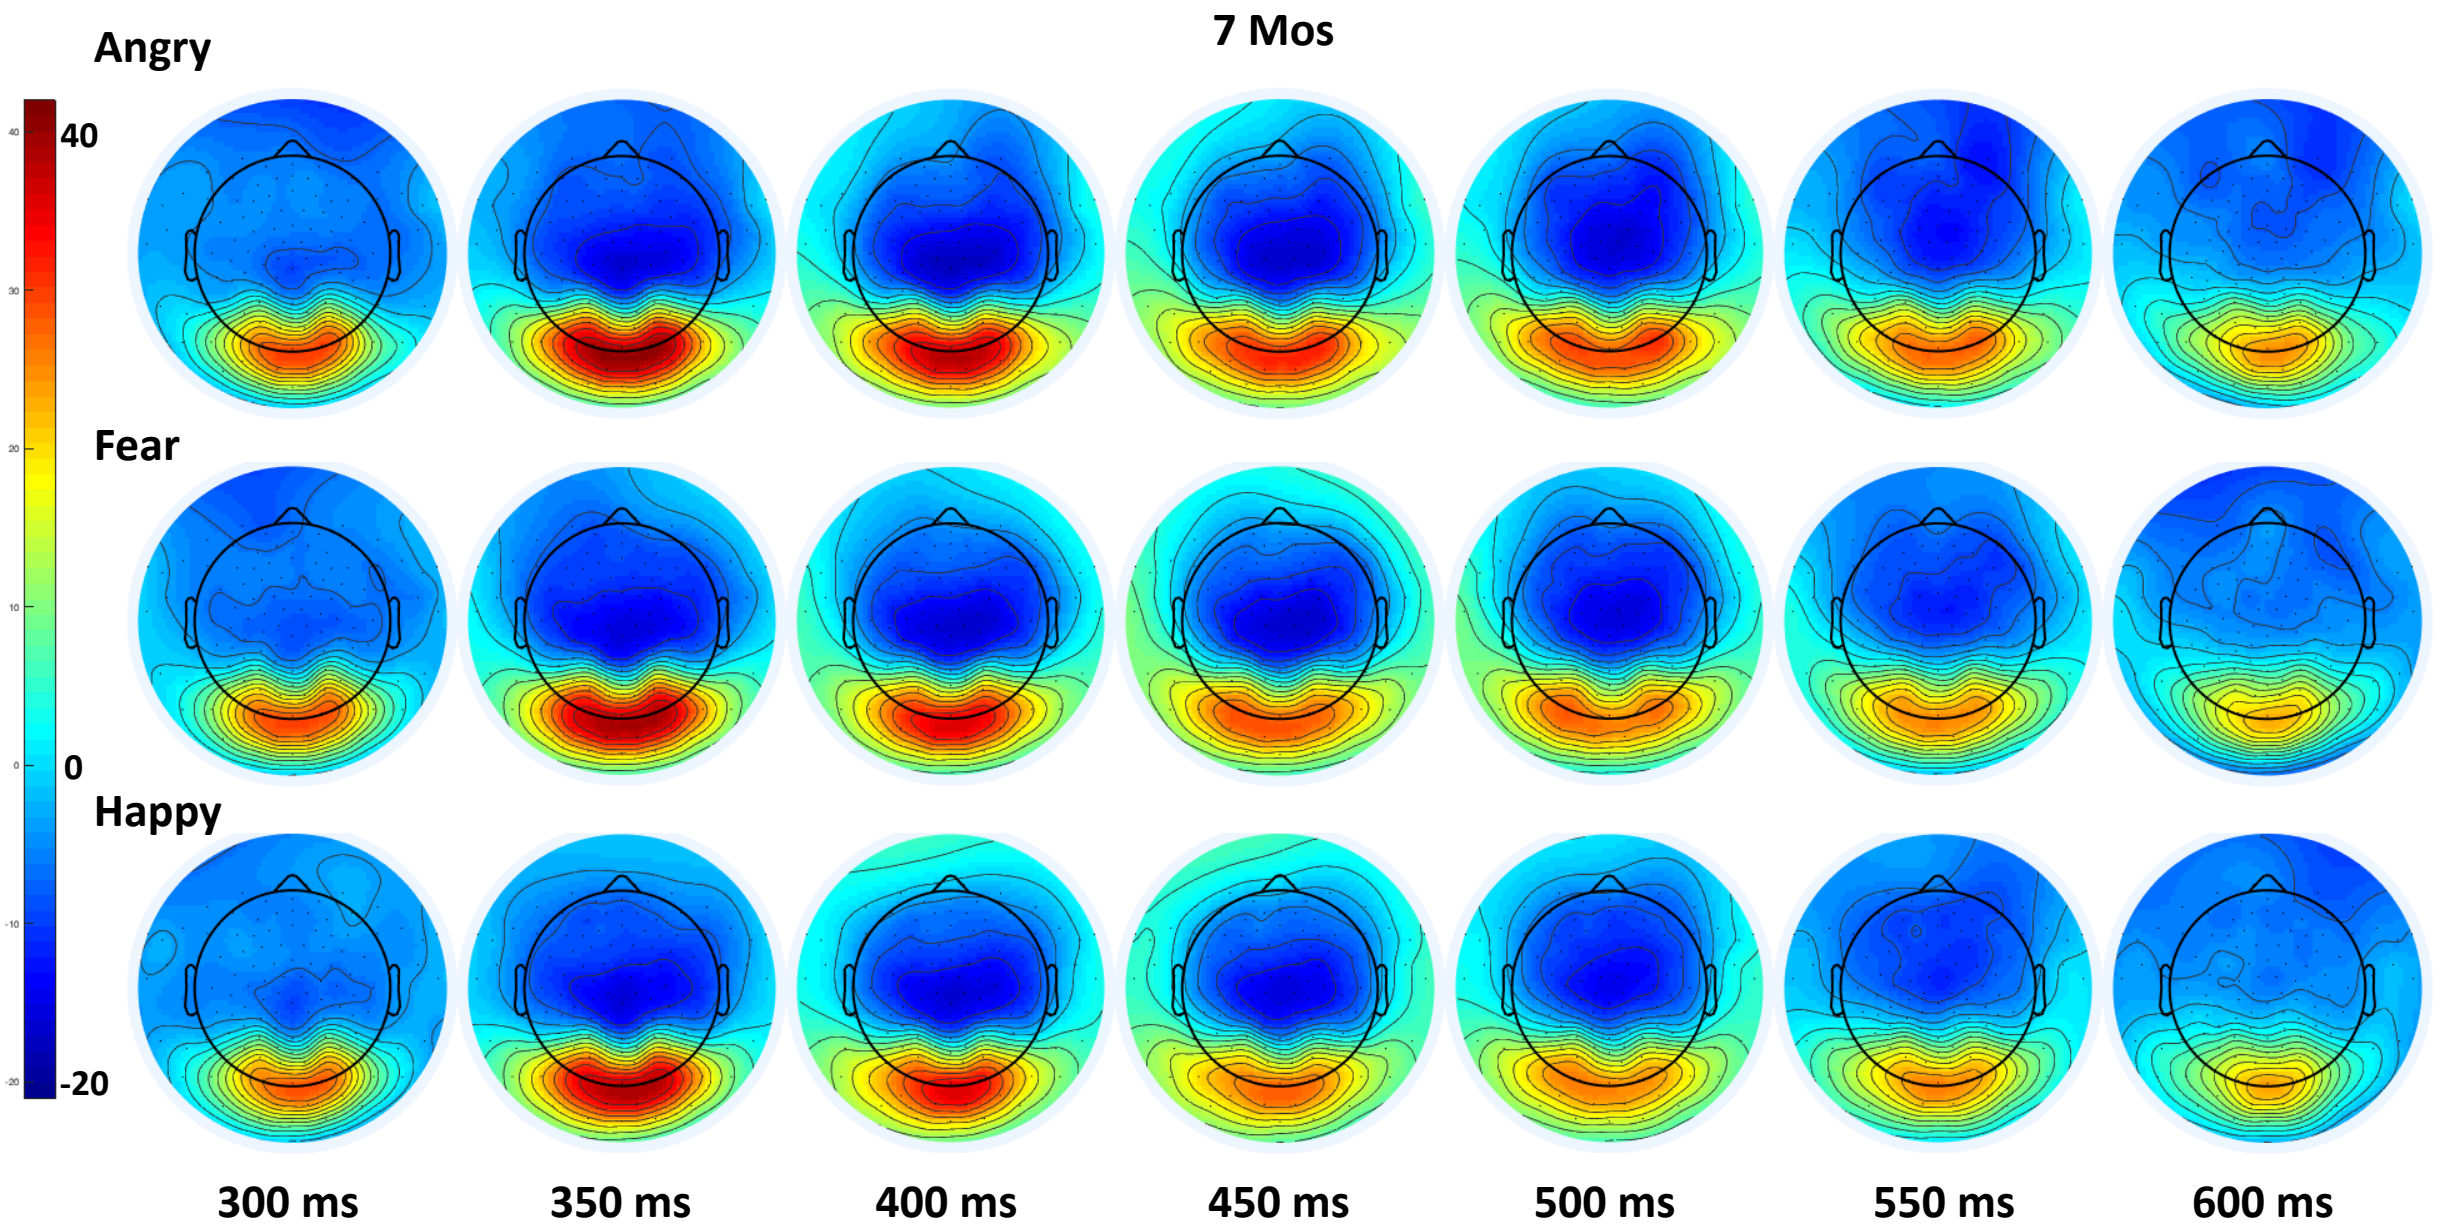



Supplemental Figure 3C. Topographical maps for the P400 and Nc activity at 12 months

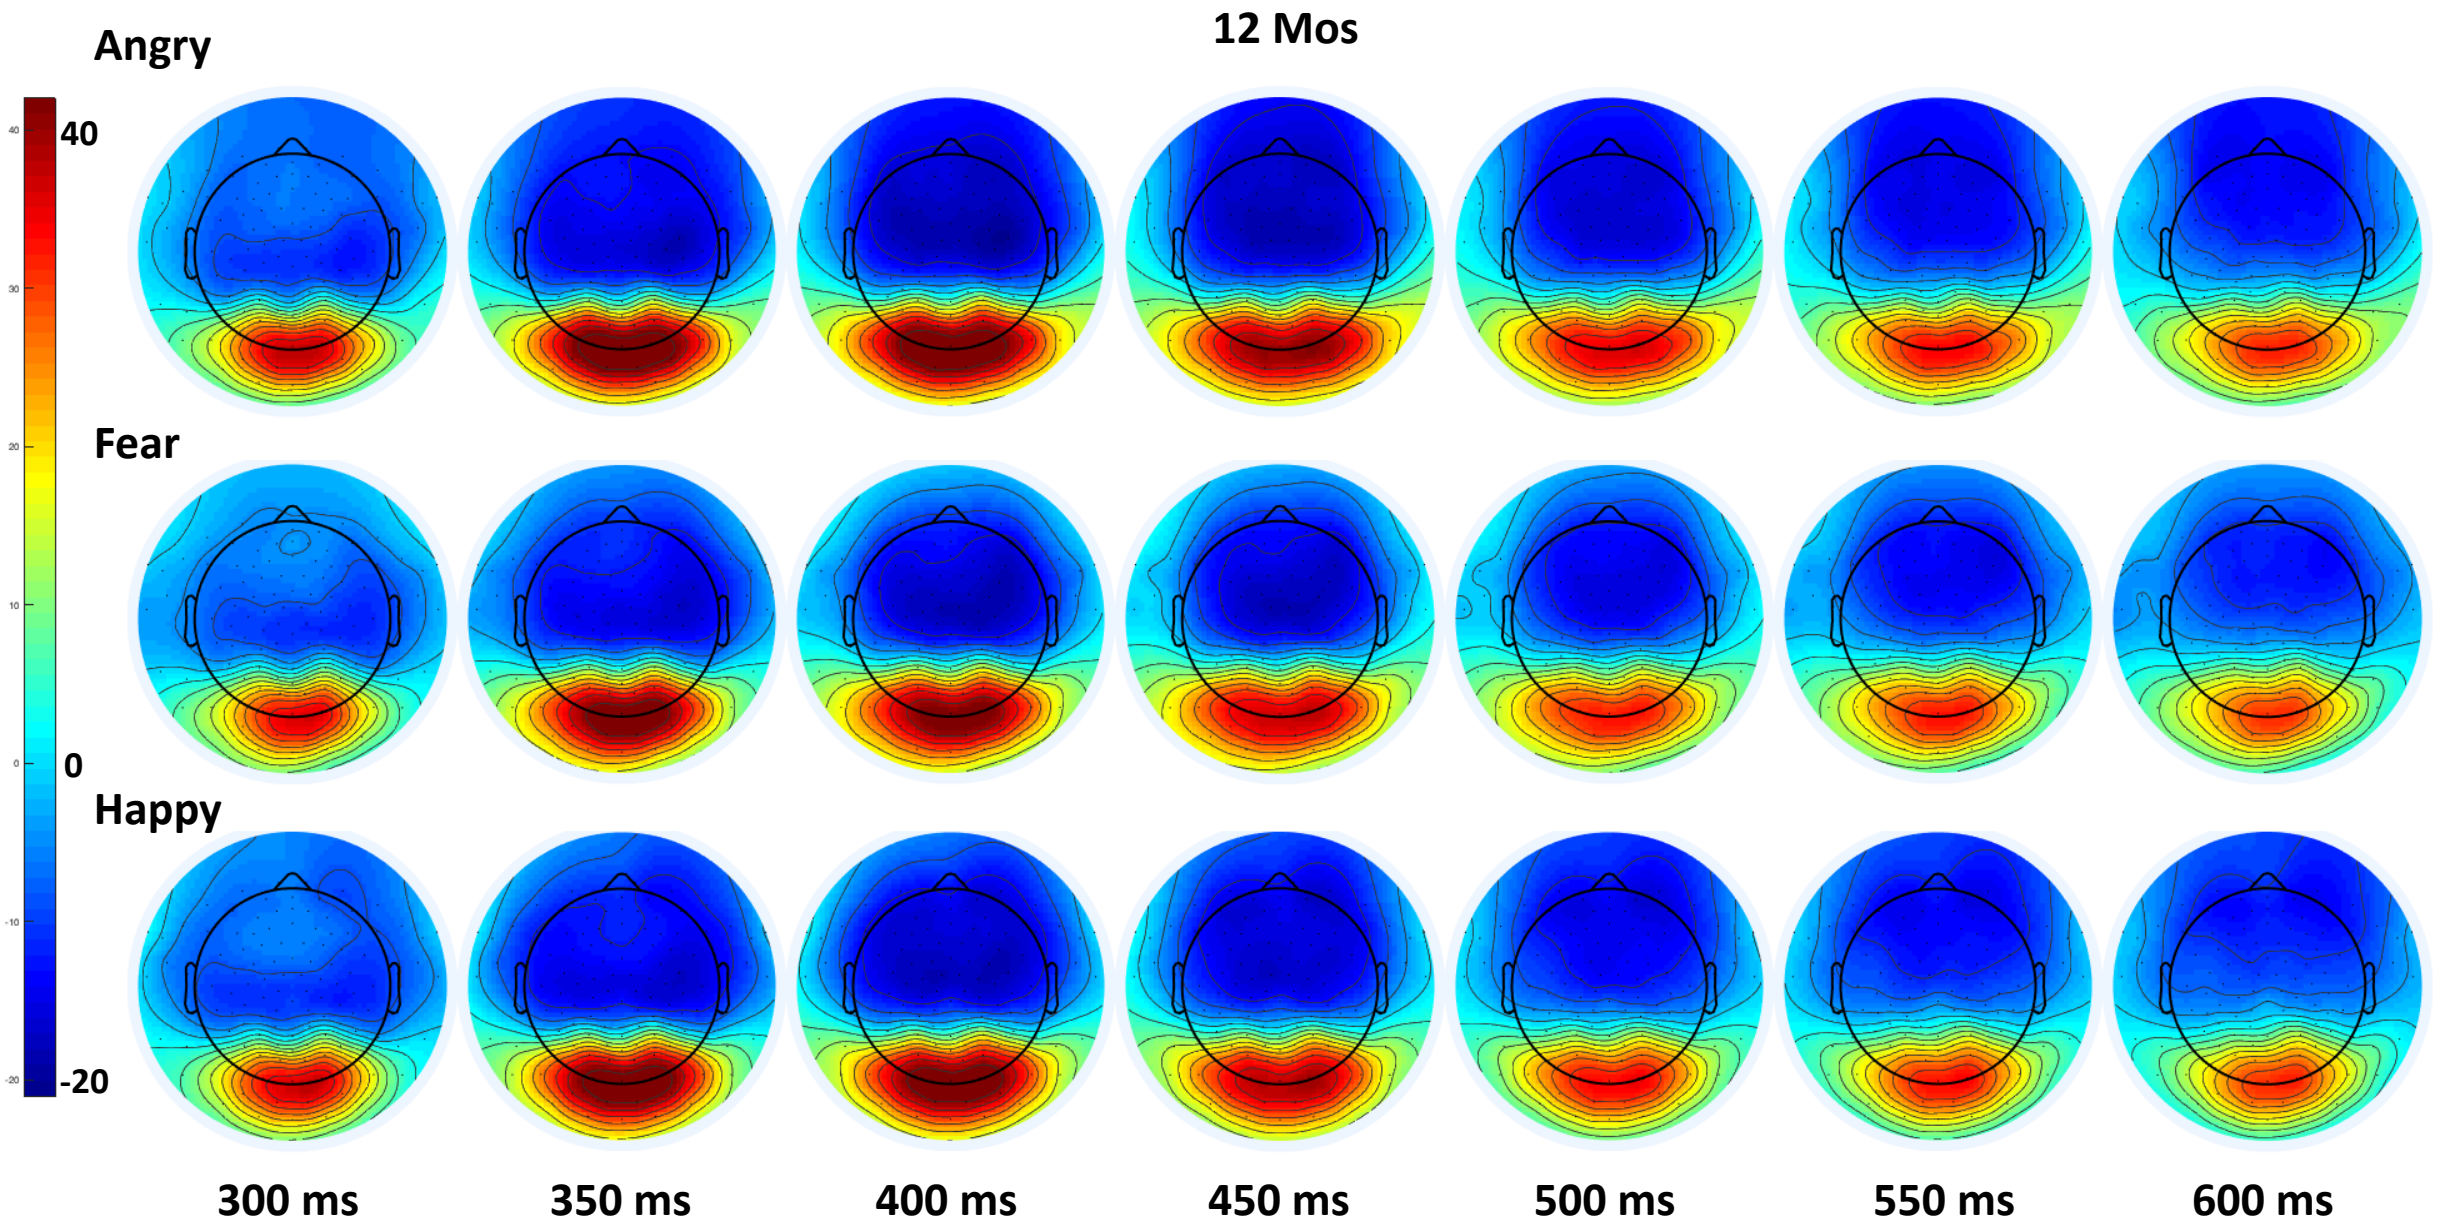



Supplemental Figure 4A. Topographical maps for the Uncorrected N290 activity at 5 months

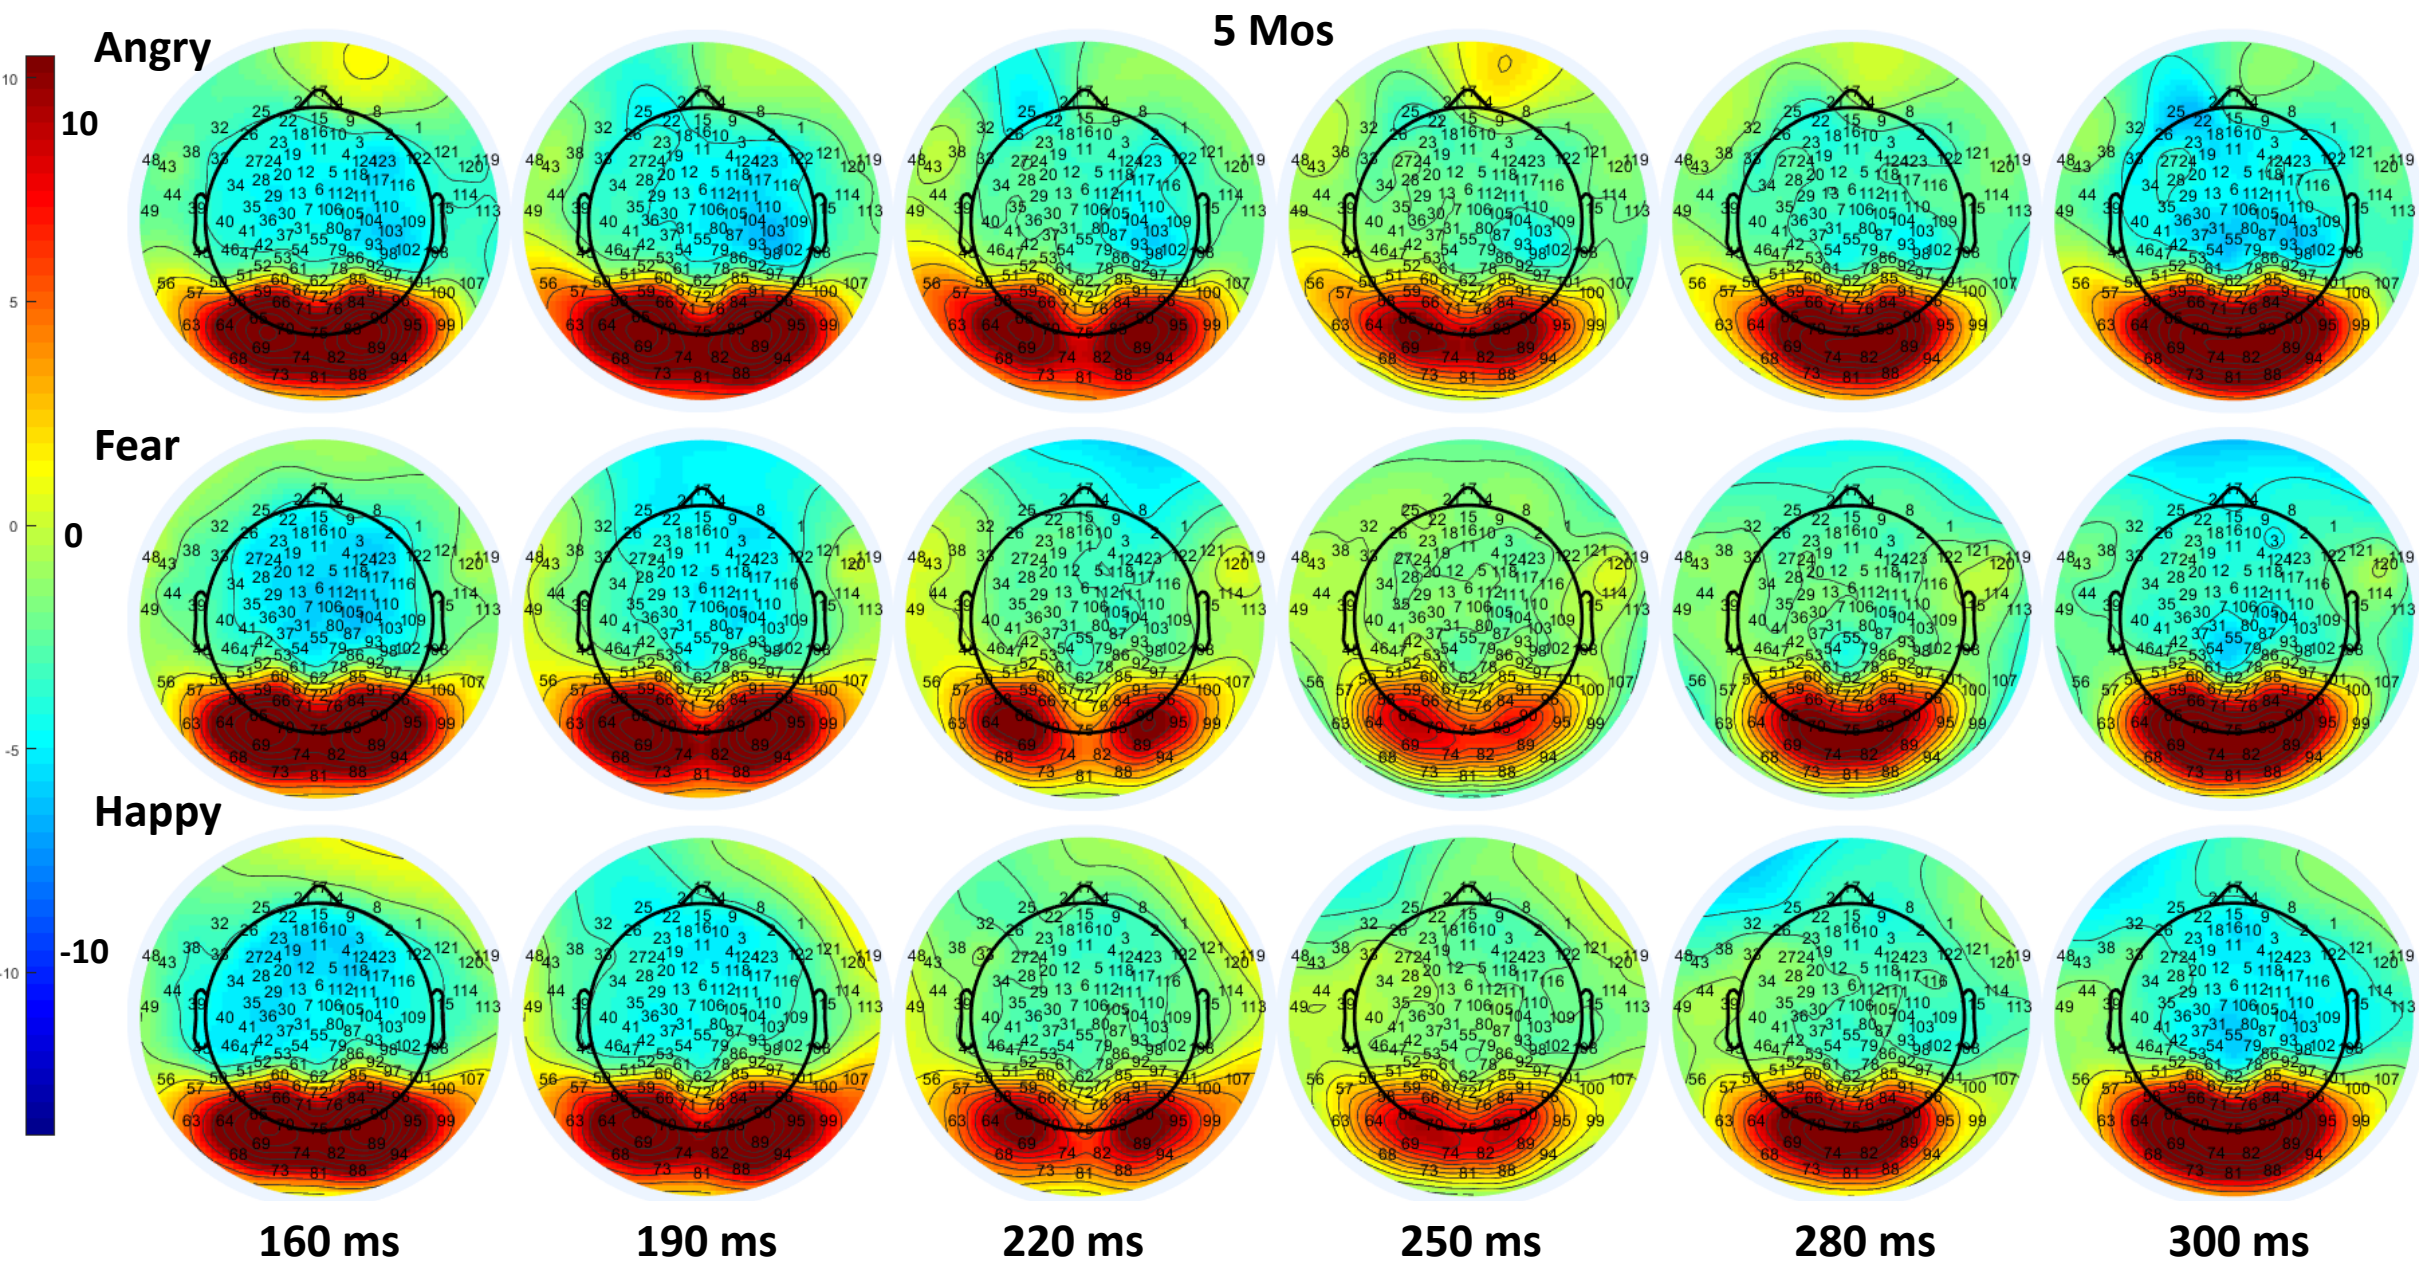



Supplemental Figure 4B. Topographical maps for the Uncorrected N290 activity at 7 months

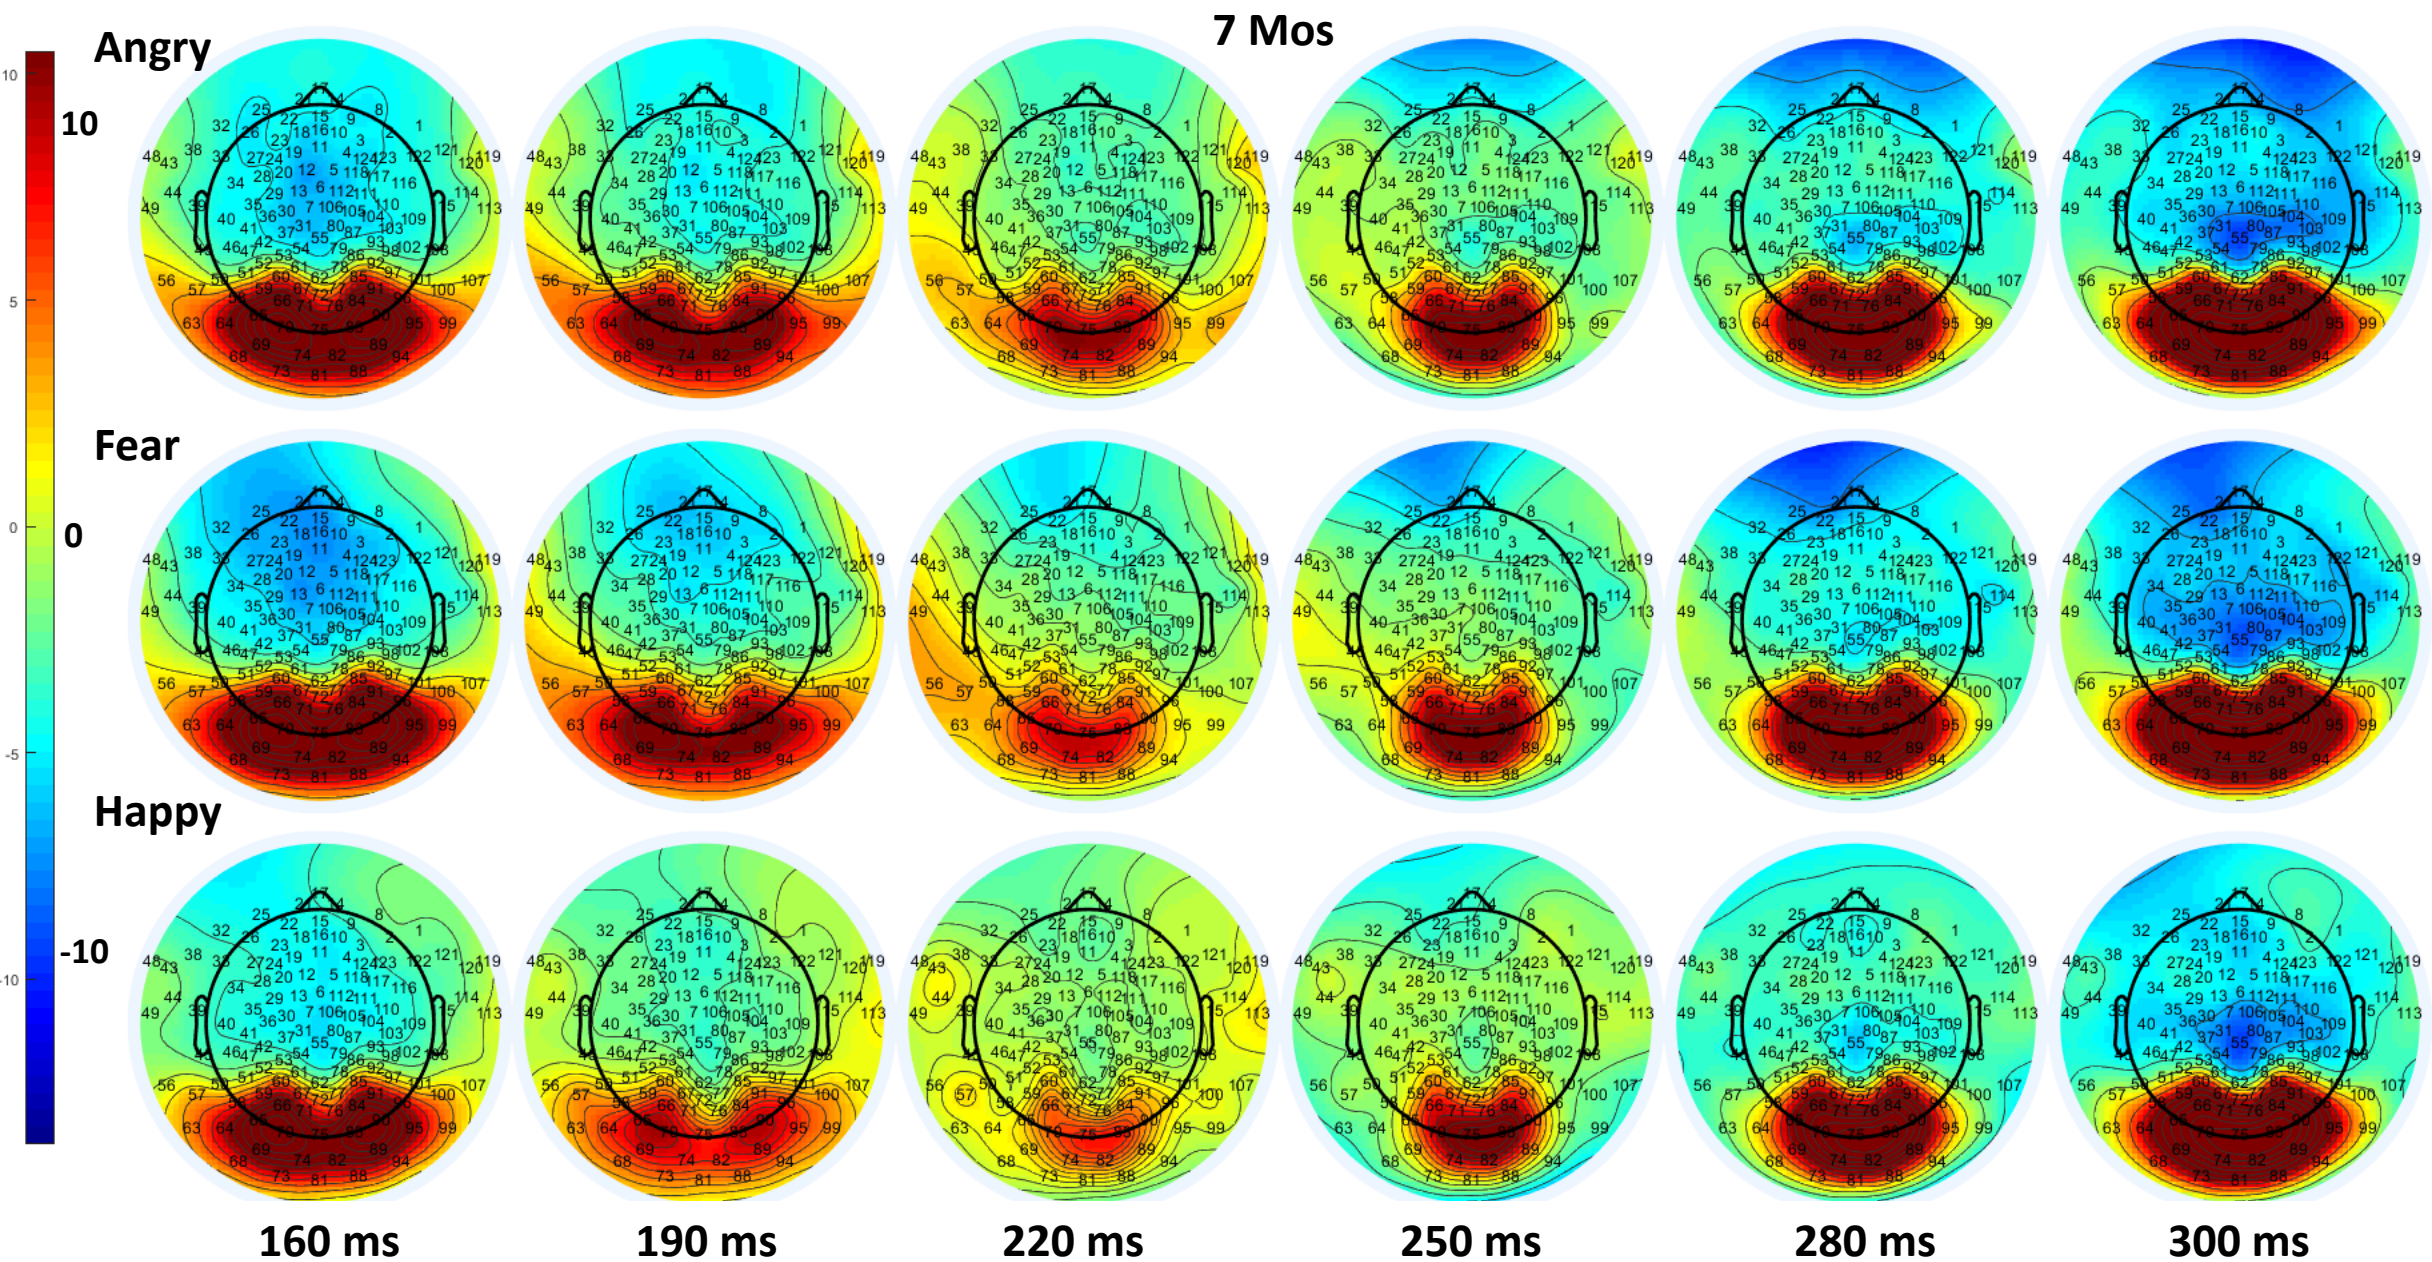



# Supplemental Figure 4C. Topographical maps for the Uncorrected N290 activity at 12 months

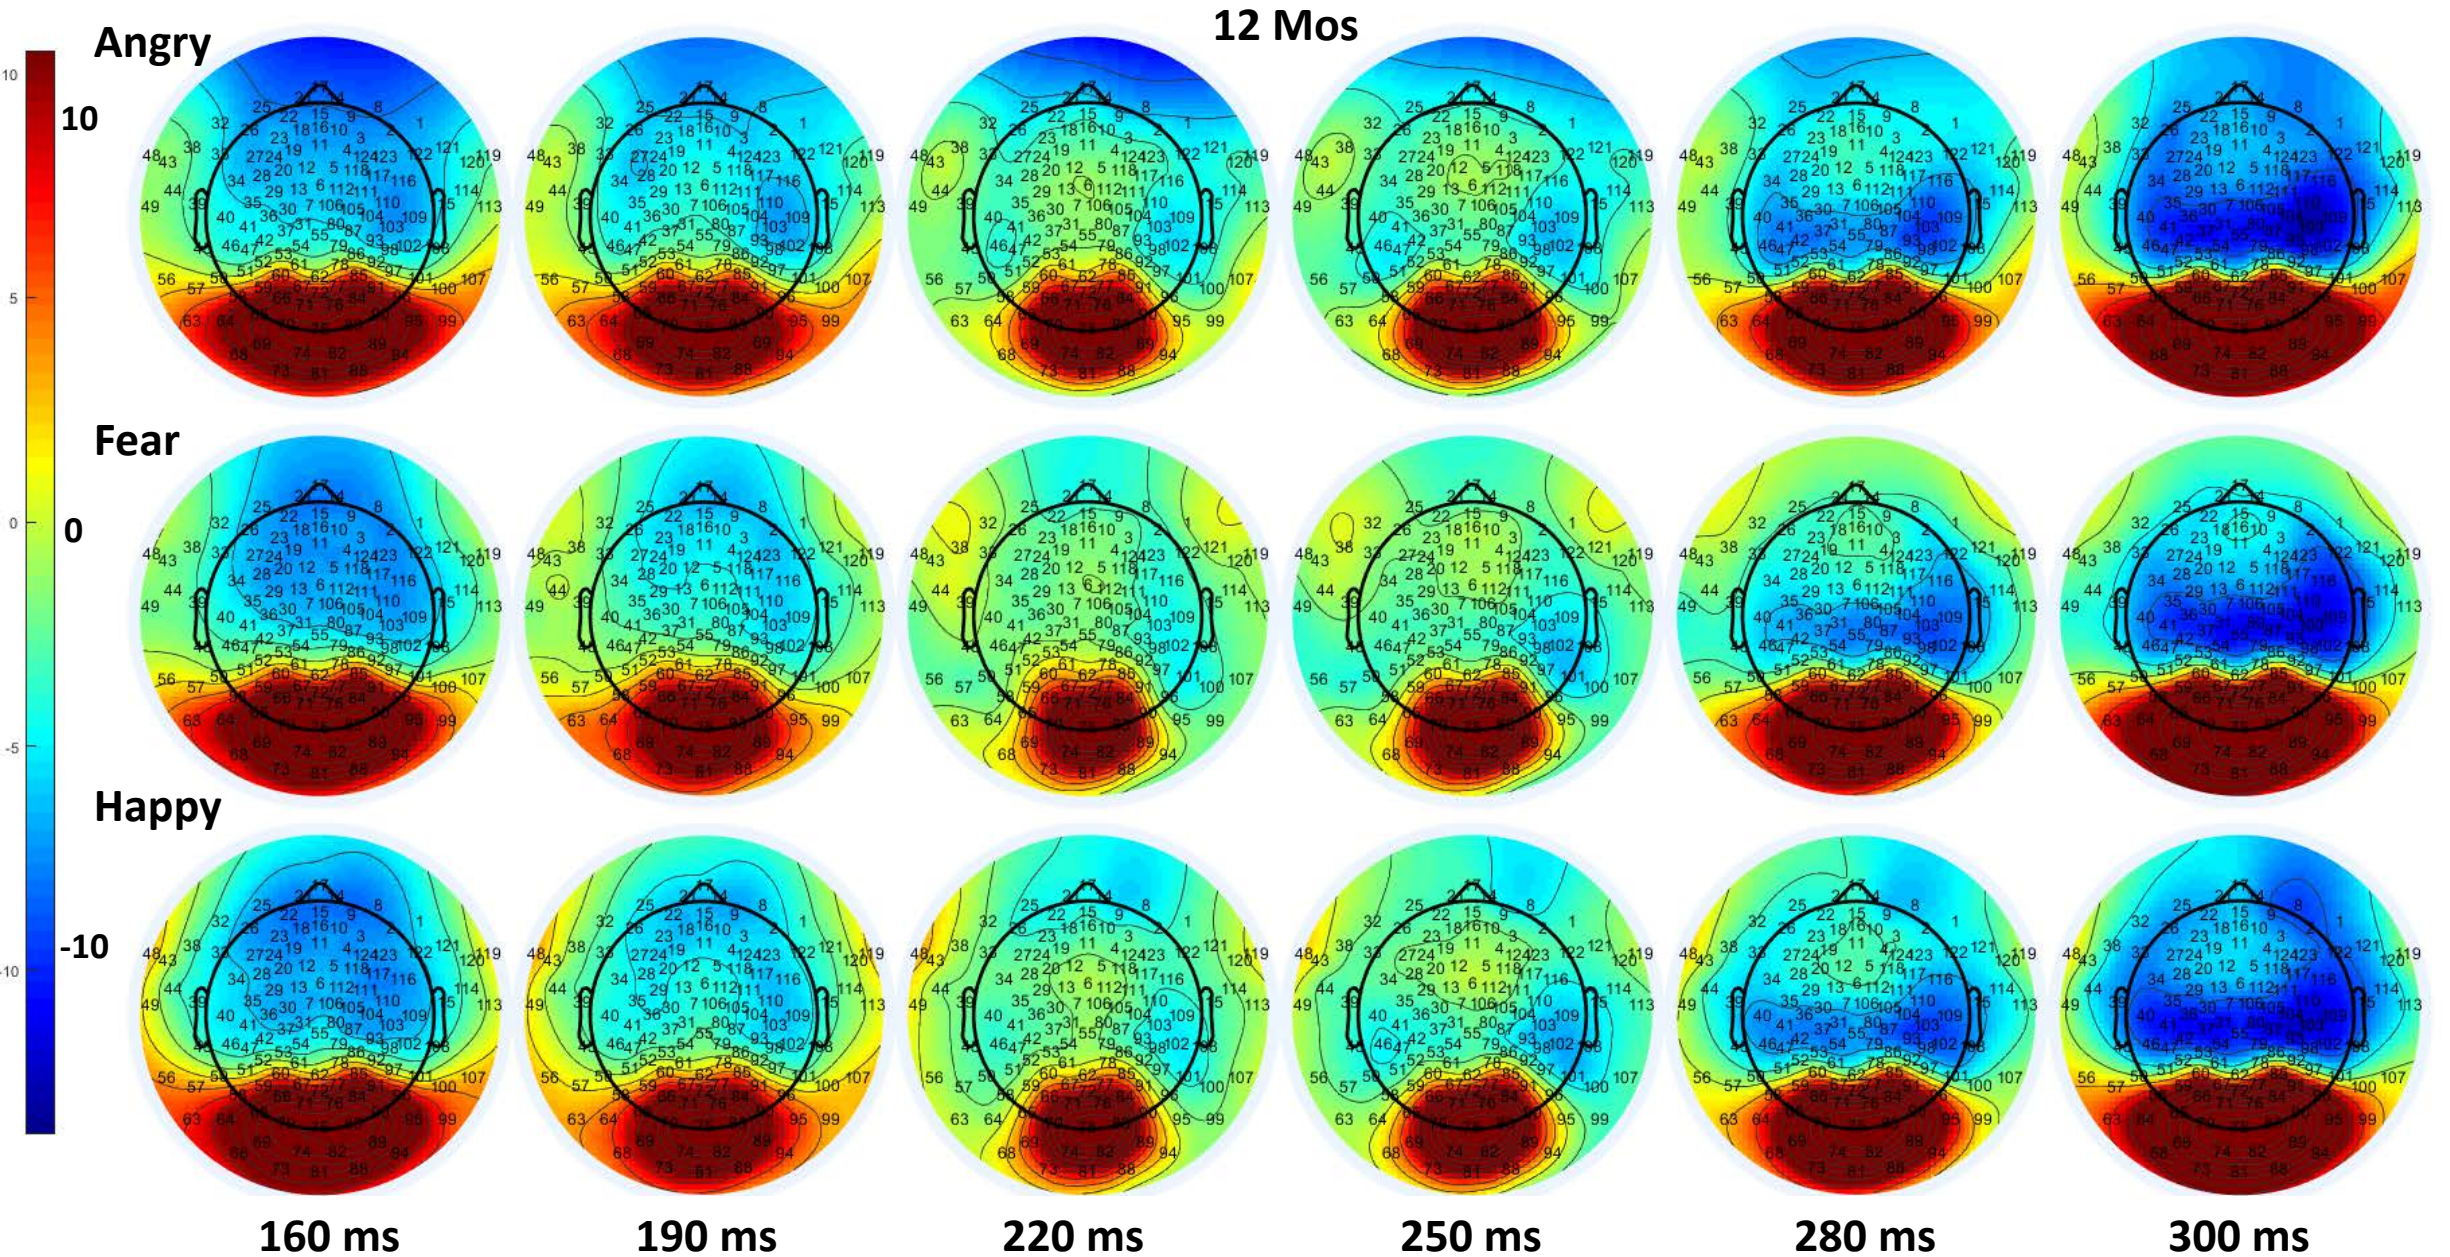



Supplemental Figure 5. Source activation in the inferior occipital and temporal regions (OFA + FFA) in the P400/Nc time window.

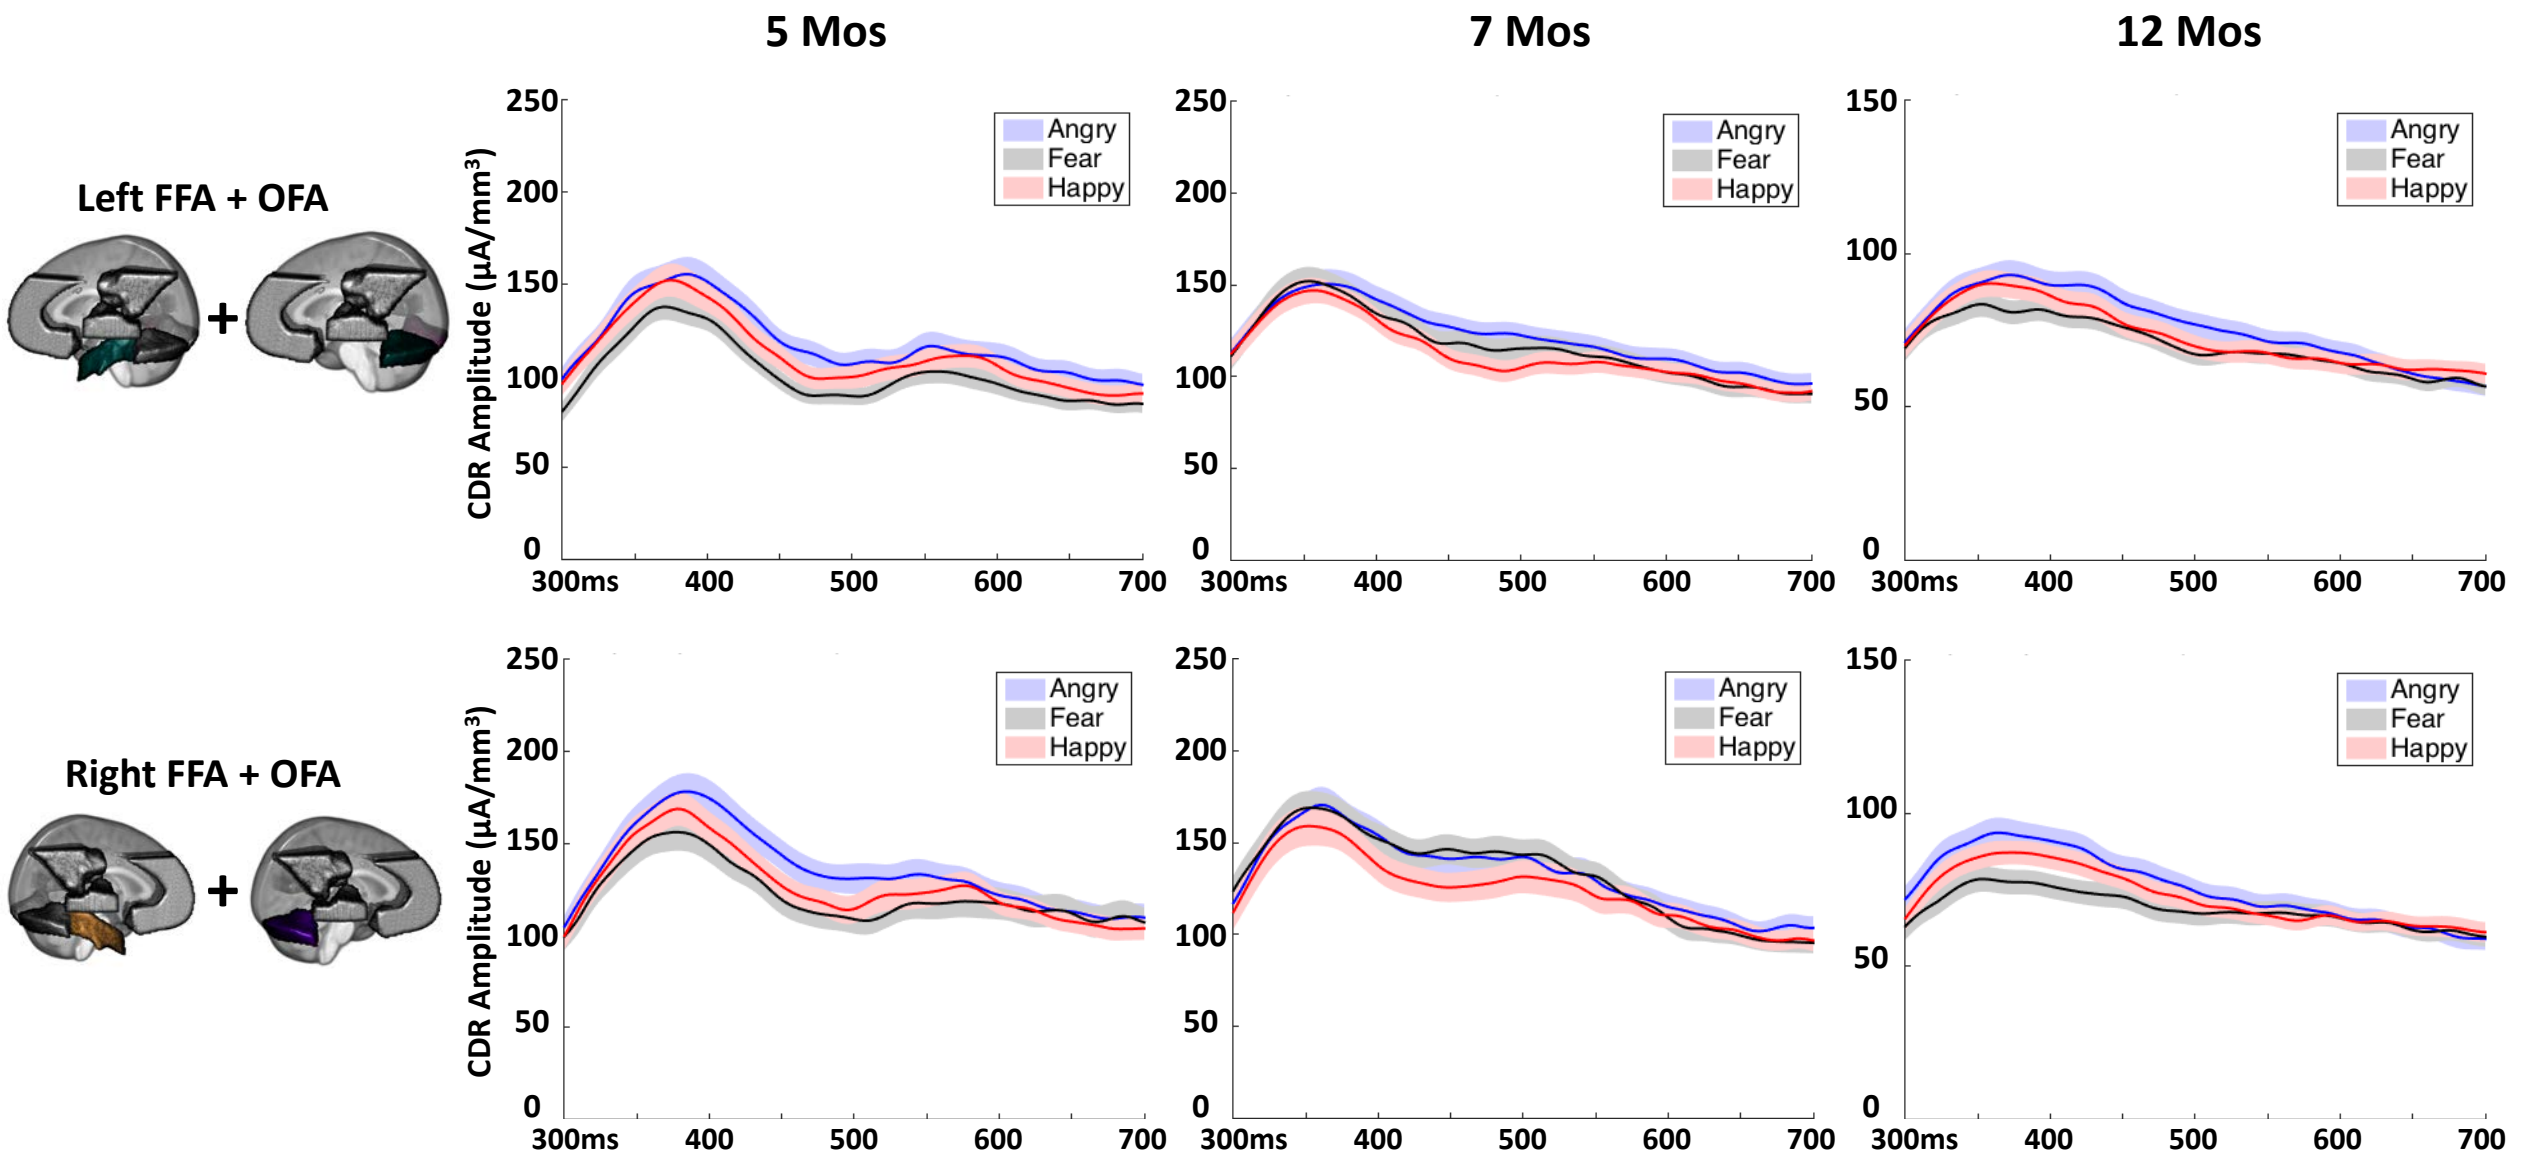



Supplemental Figure 6. Examples of the NimStim face stimuli used in the current study

**Happy**

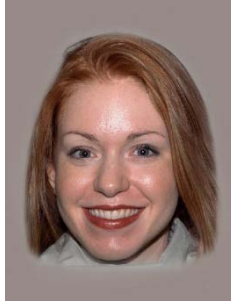

**Angry**

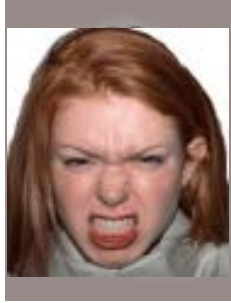

**Fearful**

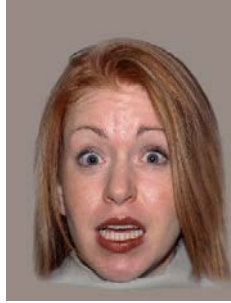

Supplement: NIHMS991024-supplement-Supp_figS1-6.pdf [file NIHMS991024-supplement-Supp_figS1-6.pdf]
